# Supplementary material for: Multifunctional REDV-conjugated zwitterionic polycarboxybetaine–polycaprolactone hybrid surfaces for enhanced antibacterial activity, anti-thrombogenicity and endothelial cell proliferation
Source: Royal Society of Chemistry journal article supplement (doi:10.1039/c5tb01598g), 2015-01-01
Supplement: c5tb01598g1.pdf [file c5tb01598g1.pdf]

## Supporting Information

### **Multifunctional REDV-Conjugated Zwitterionic Polycarboxybetaine-Polycaprolactone Hybrid Surfaces for Enhanced Antibacterial Activity, Hemocompatibility and Endothelial Cell Proliferation**

**Shaojun Yuan,<sup>a,\*</sup> Gordon Xiong,<sup>b</sup> Fei He,<sup>a</sup> Wei Jiang,<sup>a</sup> Bin Liang,<sup>a</sup> Cleo  
Choong,<sup>b,\*</sup>**

<sup>a</sup>Multiphase Mass Transfer & Reaction Engineering Lab,  
College of Chemical Engineering, Sichuan University,  
Chengdu 610065, China

<sup>b</sup>School of Materials Science and Engineering,  
Nanyang Technological University,  
50 Nanyang Avenue, Singapore 639798

---

\*To whom all correspondence should be addressed  
Tel: +86-28-85590133, Fax: +86-28-85460556

E-mail: [yuanshaojun@gmail.com](mailto:yuanshaojun@gmail.com) (S.J. Yuan), [cleochoong@ntu.edu.sg](mailto:cleochoong@ntu.edu.sg) (C. Choong)

## **S1. Experimental Section**

### **S1.1 Preparation of PCL films**

The PCL films were prepared by a solution casting method. Typically, 5 g of PCL pellets was dissolved in 40 ml of methylene chloride to form the homogenous PCL solution. Subsequently, the PCL solution was cast onto a glass substrate with predetermined thickness using an film applicator. The solvent was then removed by slow evaporation under ambient pressure at room temperature over a period of 24 h, and was further dried in a vacuum oven at 35°C for another 24 h. The as-prepared PCL films was translucent with a thickness of about 180  $\mu\text{m}$ . Finally, the resultant PCL films were cut into round-shaped specimens with a diameter of 2 cm, and were used as the PCL scaffolds for the subsequent functionalization and multifunctionality tests.

### **S1.2 Aminolysis of PCL films**

The activation of PCL films was achieved by aminolysis treatment using a similar procedures described in detail previously. Briefly, the clean PCL films were introduced to a 10% (w/w) isopropanol solution of 1,6-hexanediamine at 40°C for 30 and 60 min. After the aminolysis treatment, the PCL films were thoroughly rinsed with copious amount of isopropanol solution deionized water to remove free 1,6-hexanediamine, and dried in a vacuum oven at 30°C for 24 h. The resultant aminolyzed PCL films for 30 and 60 min were defined as the PCL-NH<sub>2</sub>-1 and PCL-NH<sub>2</sub>-2 surfaces, respectively.

### **S1.3 Cultivation of *E. coli***

The *E. coli* strain used for the antibacterial assays were cultured in yeast-dextrose broth containing 10 g/L of peptone, 8 g/L of beef extract, 5 g/L of NaCl, 5

g/L of glucose, and 3 g of yeast extract at a pH of 6.8 at 37 °C for 36 h. After the cultivation, the bacteria-enriched broth was centrifuged at 2700 rpm for 10 min to harvest the *E. coli* bacterial cells. After the removal of the supernatant, the bacterial cells were washed twice with PBS and then resuspended in PBS at a concentration of  $10^7$  cells/mL. The bacterial cell concentration based on a standard calibration with the assumption that the optical density of 1.0 at 540 nm is equivalent to about  $10^9$  cells/mL. All the pristine PCL and surface-functionalized PCL films were sterilized with UV irradiation for 1 h prior to the experiment.

#### **S1.4 Cell culture**

Human umbilical vein endothelial cells (HUVECs, ATCC CRL-1730TM) were cultured in gelatin-coated T25 flasks containing MCDB131 cell culture medium supplemented with Foetal Bovine Serum, 0.2% Bovine Brain Extract, 0.25 ug/ml amphotericin, 0.1 mg/ml heparin, 100 U/ml penicillin, and 100 ug/ml streptomycin at 37 °C under conditions of 5% CO<sub>2</sub> atmosphere and 95% humidity. The HUVECs were subcultured upon reaching 80% confluency using 0.25% trypsin-EDTA (Gibco, Life Technologies) after washing twice with sterile PBS. Cells were provided with freshly prepared medium every 48 h and cells from passage 4-8 were used for the subsequent experiments.

## S2. Results and Discussion

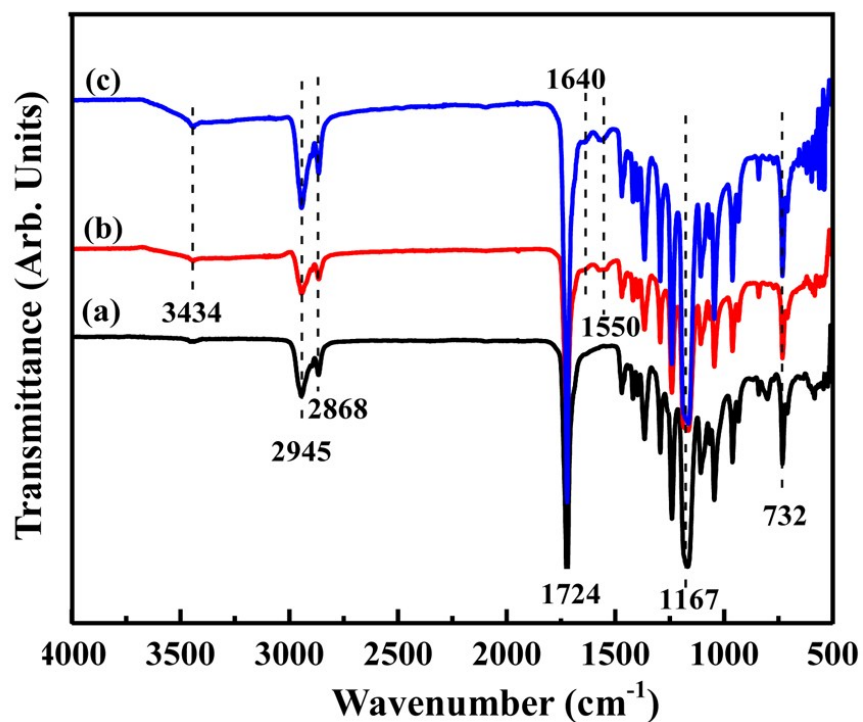

**Fig. S1** ATR-FTIR spectra of the (a) pristine PCL, (b) PCL-NH<sub>2</sub>-1 (from 30 min of aminolysis), and PCL-NH<sub>2</sub>-2 (from 60 min of aminolysis). Successful introduction of amino groups onto the PCL substrates can be deduced from the appearance of characteristic bands at 3434 cm<sup>-1</sup> ( $\nu_{\text{(N-H)}}$ ), 1630 cm<sup>-1</sup> (amide I) and 1536 cm<sup>-1</sup> (amide II).

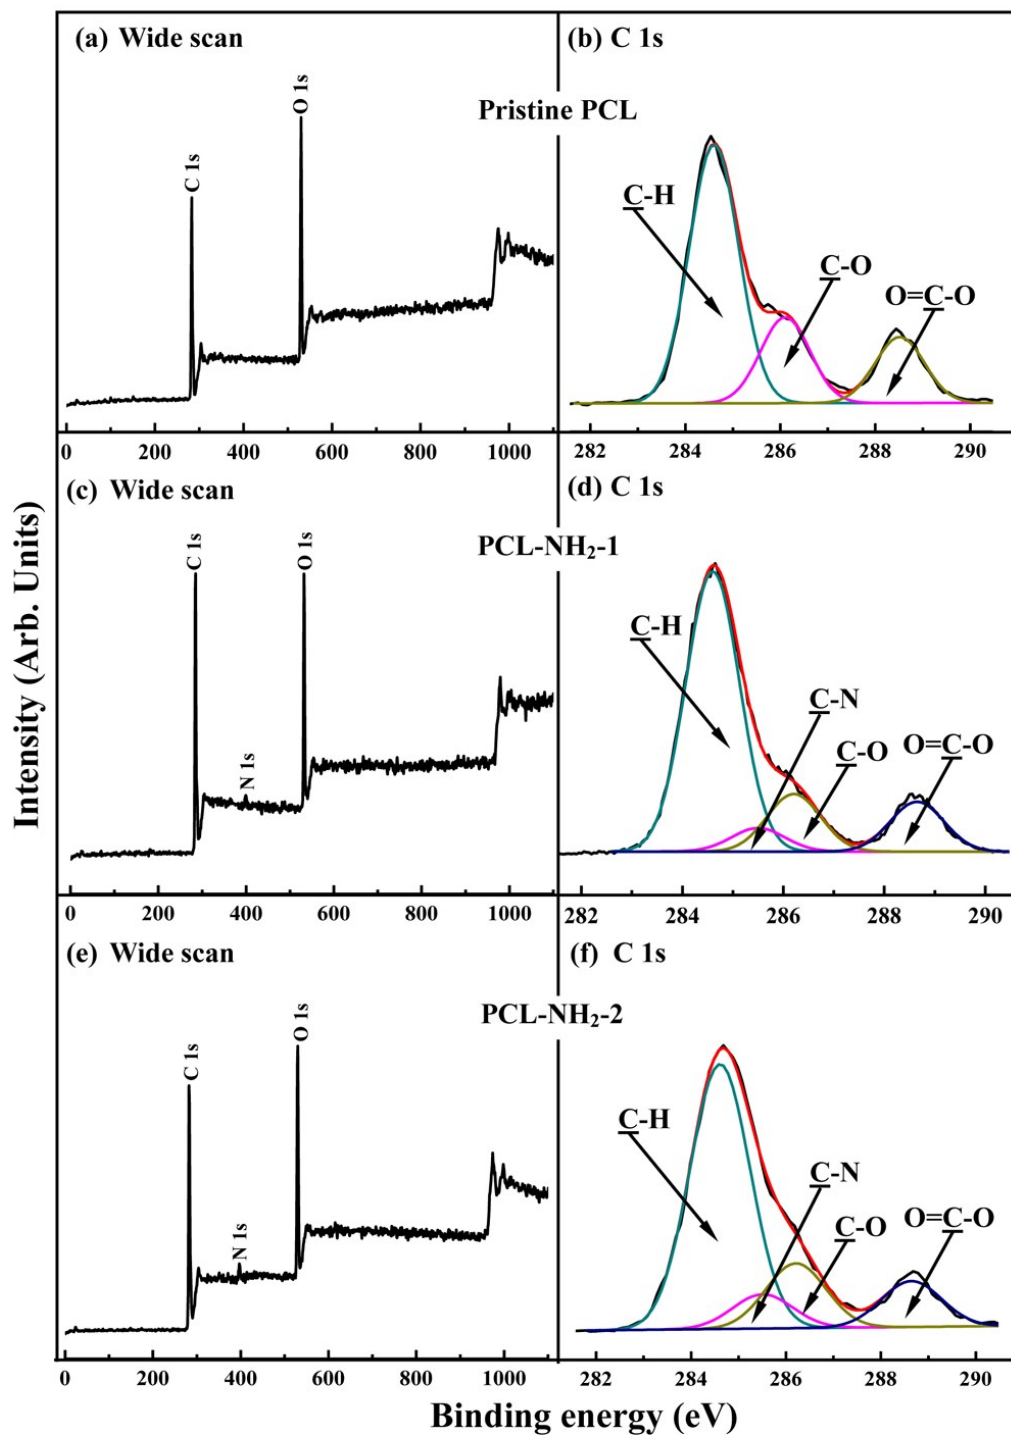

**Fig. S2** Wide scan and C 1s core-level XPS spectra of the (a,b) pristine PCL, (c,d) PCL-NH<sub>2</sub>-1 (from 30 min of aminolysis) and (e,f) PCL-NH<sub>2</sub>-2 (from 60 min of aminolysis). The appearance of additional N 1s signals indicated the successful introduction of amino groups on the PCL substrates.

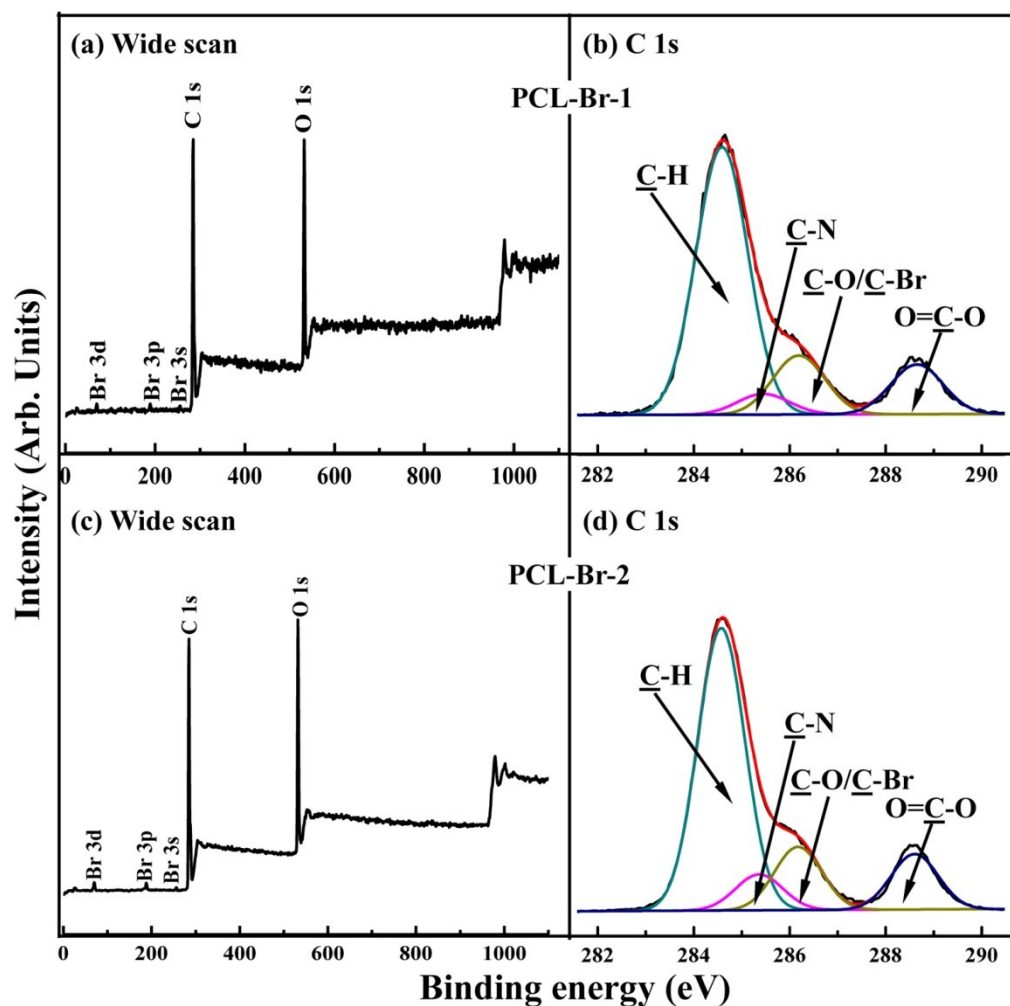

**Fig. S3** Wide scan and C 1s core-level XPS spectra of the (a,b) PCL-Br-1 (from 30 min of aminolysis), (c,d) PCL-NH<sub>2</sub>-1 (from PCL-NH<sub>2</sub>-1 surface) and (e,f) PCL-NH<sub>2</sub>-2 (from PCL-NH<sub>2</sub>-2 surface). The appearance of additional N 1s signals indicated the successful introduction of amino groups on the PCL substrates.

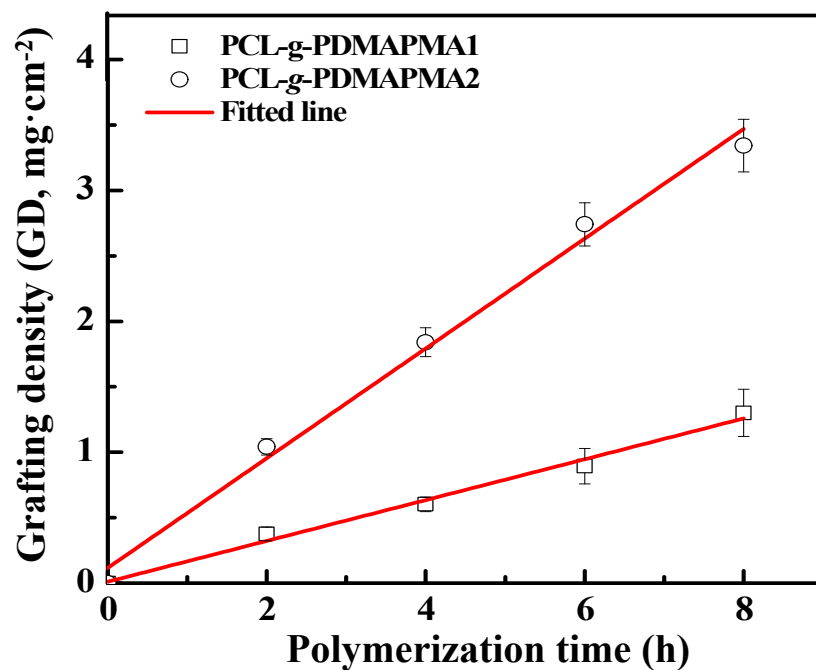

**Fig. S4** A linear relationship for the grafting density of the PDMA DMA brushes grafted from the respective PCL-Br-1 and PCL-Br-2 surfaces as a function of ATRP time. The PDMA DMA chain growth on the PCL substrates was found to proceed in a well-controlled manner by varying the surface density of ATRP initiator and reaction time.

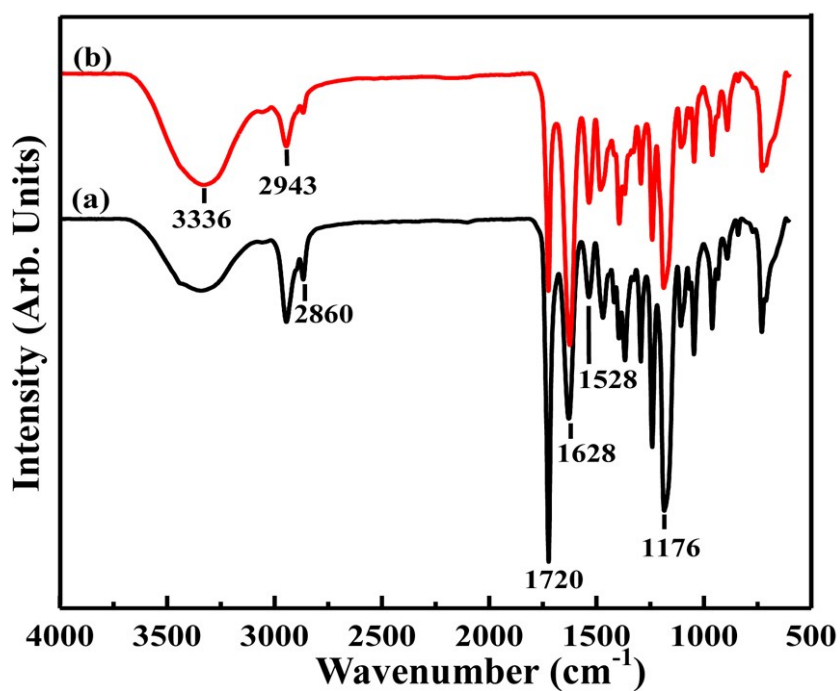

**Fig. S5** FTIR spectra of the (a) PCL-g-QPDMAPMA1 (from the PCL-g-PDMAPMA1 surface), (b) CL-g-QPDMAPMA2 (from the PCL-g-PDMAPMA2 surface) surfaces. Successful *N*-alkylation of pendent tertiary amino groups of the PDMAPMA brushes was confirmed by the significant increase in the relative intensity of characteristic bands at 3336 cm<sup>-1</sup> ( $\nu_{\text{O-H}}$ ), 1628 cm<sup>-1</sup> (amide I,  $\nu_{\text{C=ONH}}$ ) and 1528 cm<sup>-1</sup> (amide II,  $\delta_{\text{N-H}}$ ).



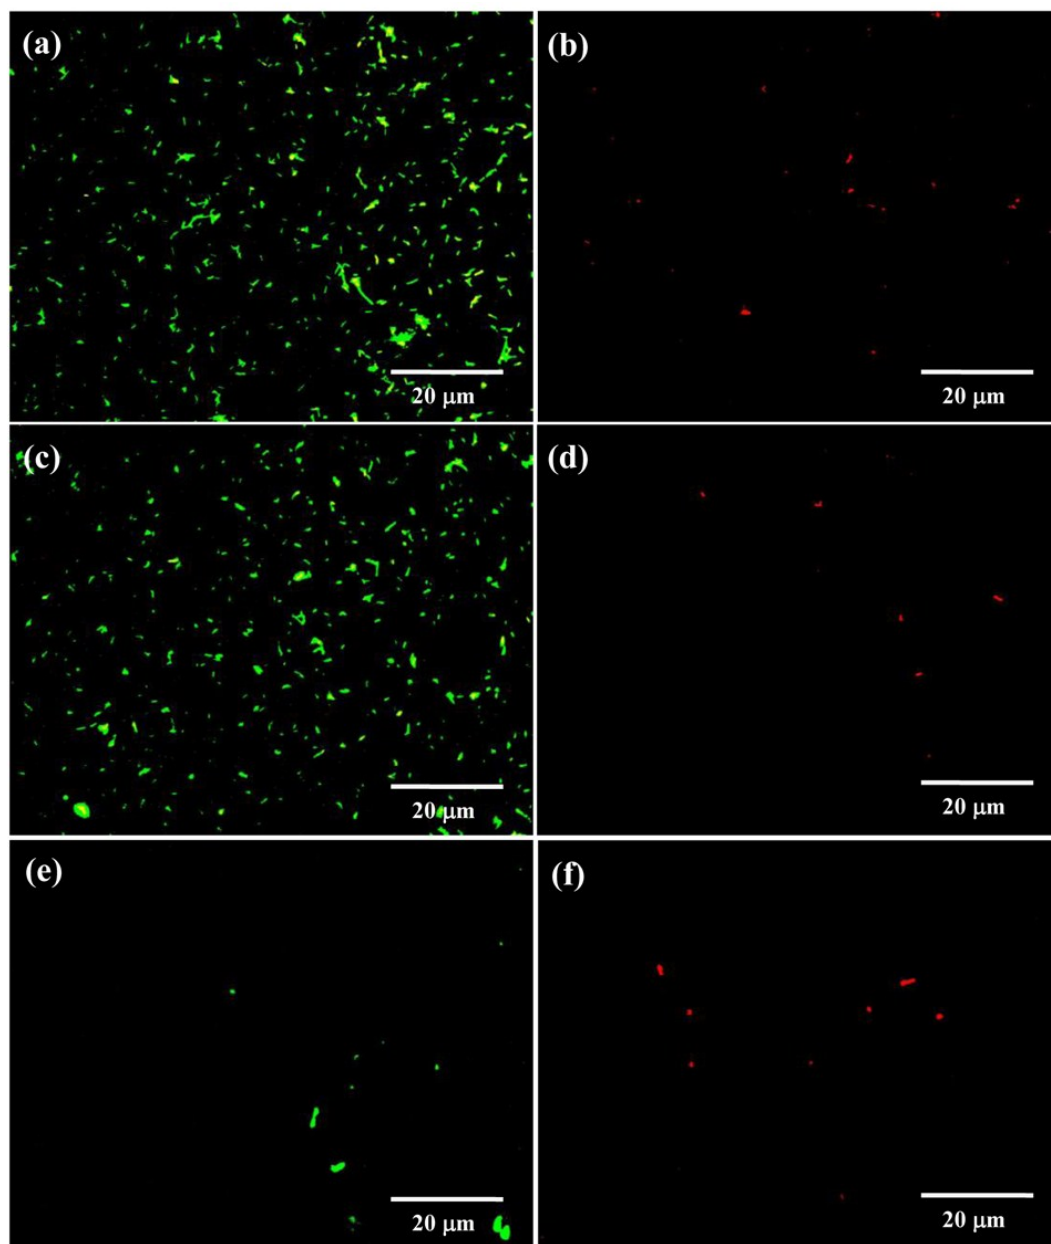

**Fig. S6** Representative fluorescence microscopy images of *E. coli* attached on the (a,b) PCL-NH<sub>2</sub>-2 (from 60 min of aminolysis), (c,d) PCL-g-PDMADMA2 (from the PCL-Br-2 surface) after 8 h of ATPR reaction, and (e,f) PCL-g-QPDAMPMA1 (from the PCL-g-PDMAPMA1 surface). The presence of zwitterionic Polycarboxybetaine brushes resulted in a significant reduction of *E. coli* amount attached to the PCL scaffold surface as compared to that on the aminolyzed and PDMAPMA-grafted surface.

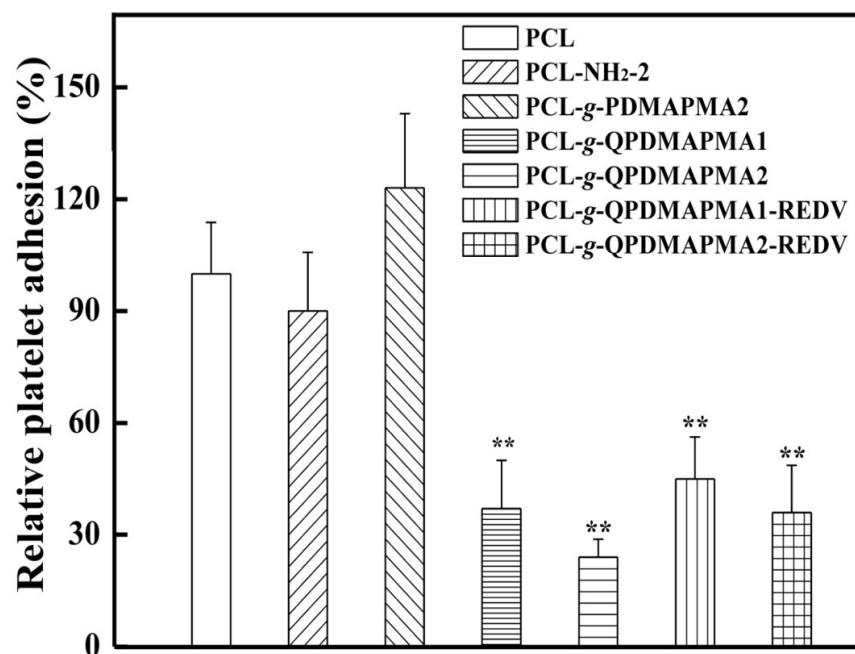

**Fig. S7** Platelet adhesion results for the pristine PCL, PCL-NH<sub>2</sub>-2, PCL-g-PDMAPMA2, PCL-g-QPDMAPMA2, PCL-g-QPDMAPMA2, (e) PCL-g-QPDMAPMA1-REDV, and PCL-g-QPDMAPMA2-REDV surfaces after 90 min incubation with platelet-rich plasma (PRP) at 37°C.

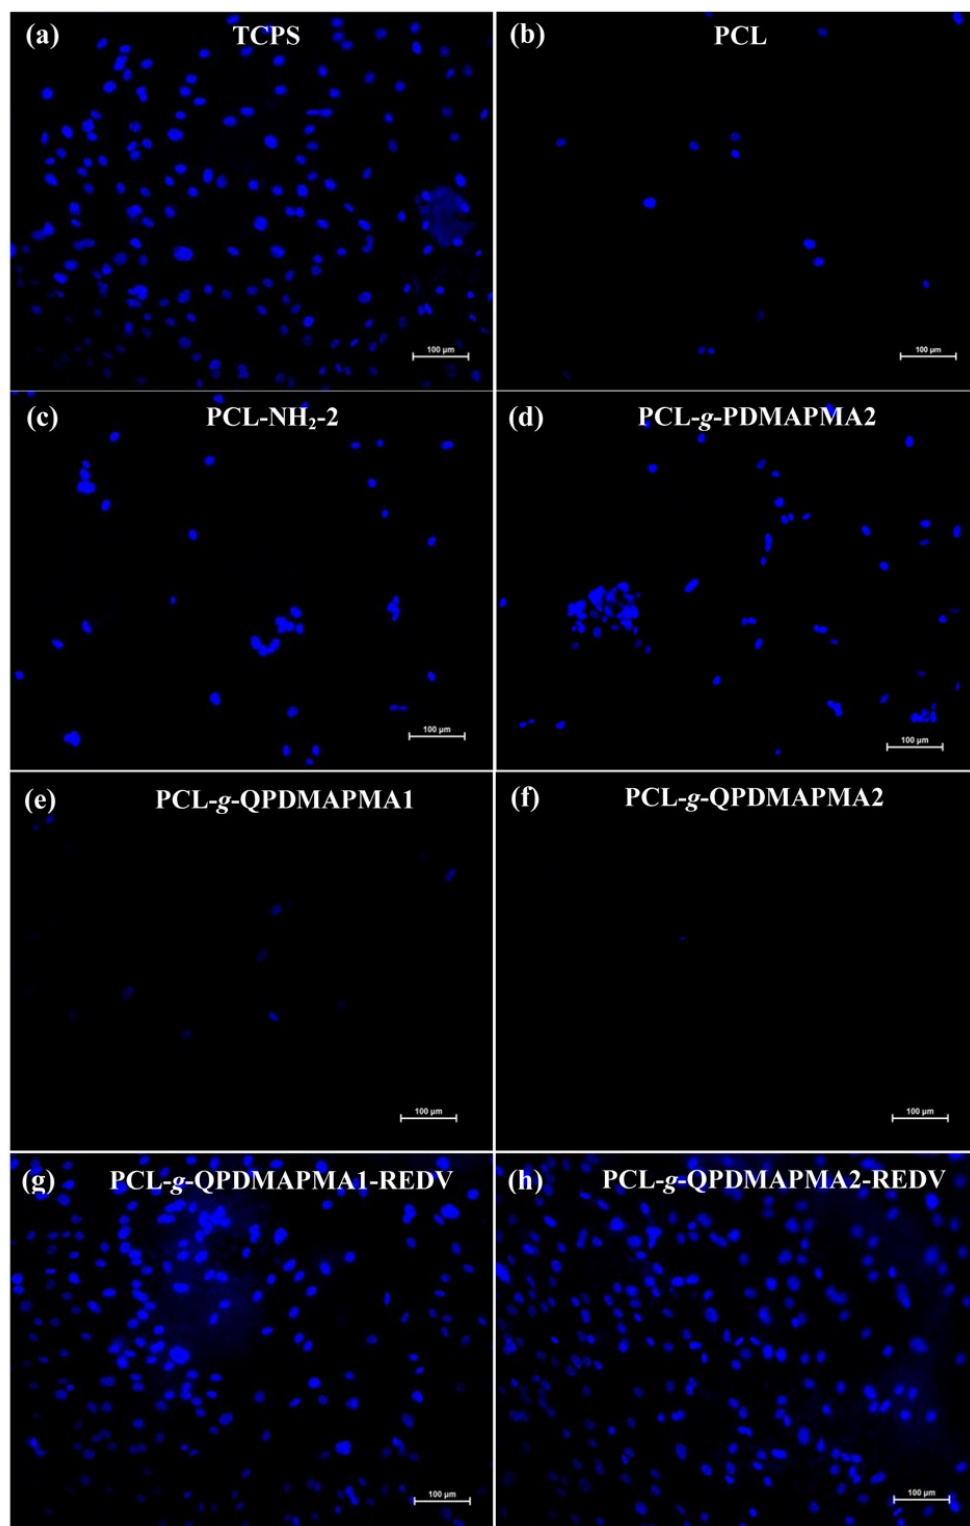

**Fig. S8** Representative fluorescence images of DAPI-staining of ECs attached on the (a) TCPS control, (b) pristine PCL, (c) PCL-NH<sub>2</sub>-2, (d) PCL-*g*-PDMA2, (e) PCL-*g*-QPDMA1, (f) PCL-*g*-QPDMA2, (g) PCL-*g*-QPDMA1-REDV

and (h) PCL-g-QPDMAPMA1-REDV surfaces after 24 h of incubation at 37°C under a 5% CO<sub>2</sub> atmosphere. Scale bar: 100 μm. The substantial improvement in the attachment of ECs were observed on the conjugation of REDV peptide onto the PCL scaffold surfaces.
